# Supplementary material
Source: PubMed Central journal article supplement (PMC4120959)

**Supplementary Figure 1: Correspondence between cortex-to-whole-cerebellum SUVR and cortex-to-cerebellar-GM SUVR**

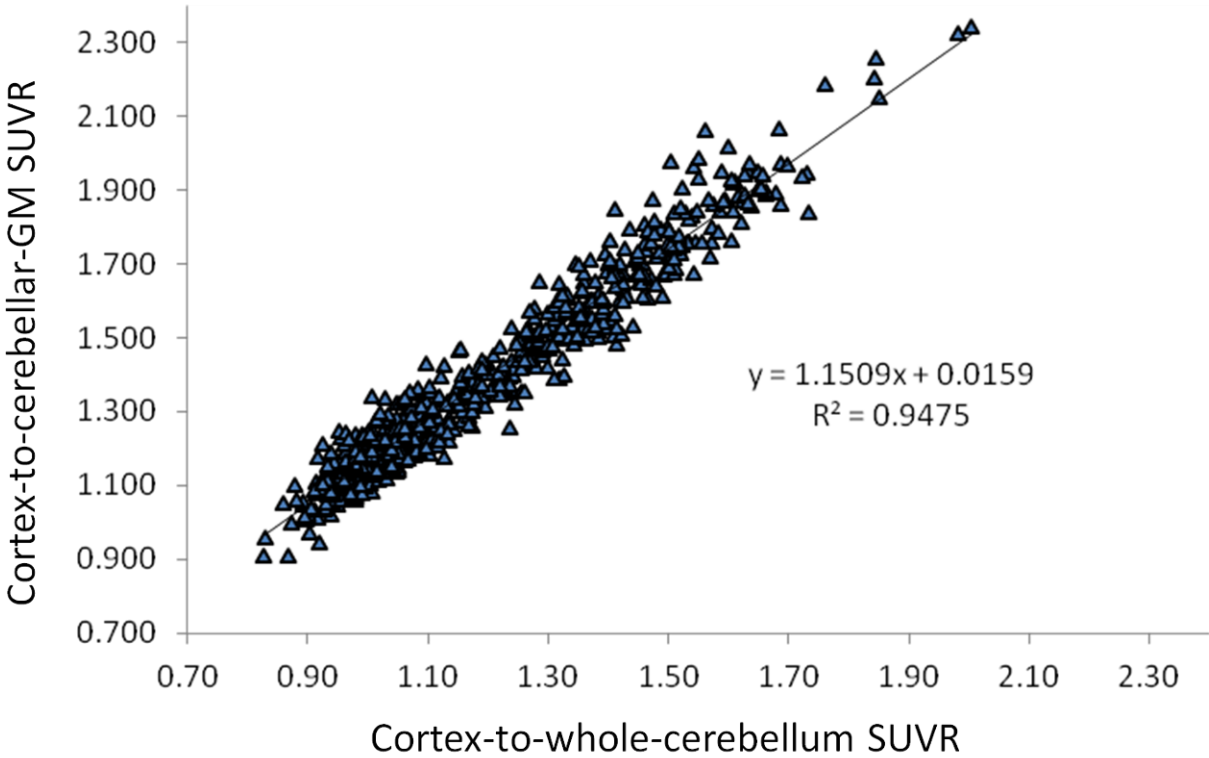

Supplement: NIHMS602613-supplement-supplement_1.pdf [file NIHMS602613-supplement-supplement_1.pdf]
