# Supplementary material
Source: PubMed Central journal article supplement (PMC4120959)

Supplementary Figure 2: Probability density function of MMSE scores

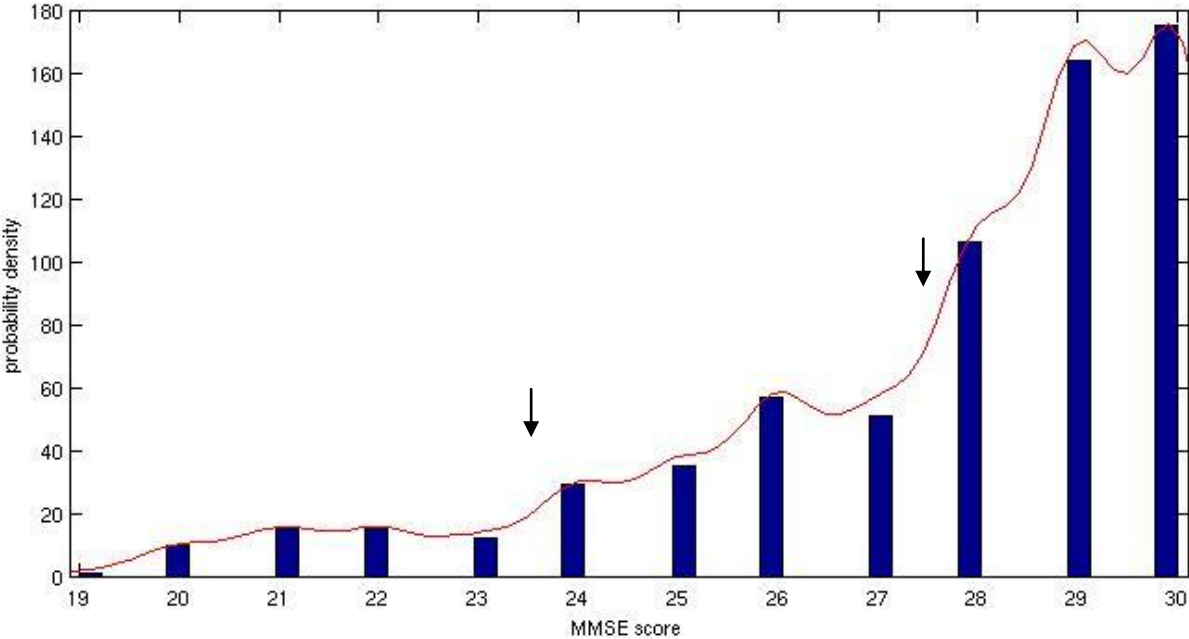

Supplement: NIHMS602613-supplement-supplemen_2.pdf [file NIHMS602613-supplement-supplemen_2.pdf]
